# Supplementary material for: PLK1 Inhibition alleviates transplant-associated obliterative bronchiolitis by suppressing myofibroblast differentiation
Source: publisher site journal article supplement (doi:10.18632/aging.103330), 2020-06-15
Supplement: Supplementary file [file aging-v12i12-103330-supplementary-material-SD1.pdf]

## SUPPLEMENTARY FIGURES

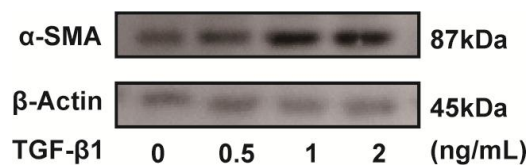

Supplementary Figure 1. Fibroblasts were stimulated by different concentrations of TGF- $\beta$ 1.

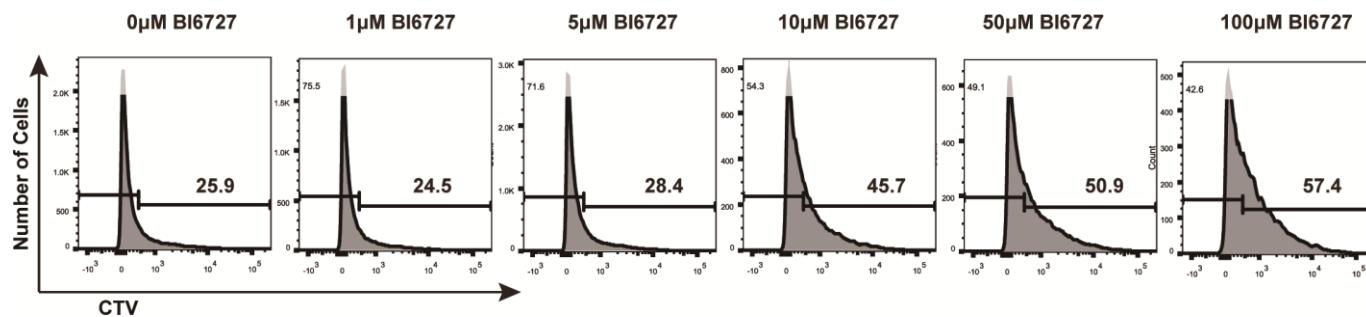

Supplementary Figure 2. Fibroblast proliferation is not affected by BI6727 treatment for 72 hours.
